# Supplementary material for: Tumour-associated and non-tumour-associated microbiota in colorectal cancer
Source: PubMed Central journal article supplement — Gut. 2016 Mar 18;66(4):633–43. doi: 10.1136/gutjnl-2015-309595 (PMC5529966; doi:10.1136/gutjnl-2015-309595), 2016-03-18
Supplement: gutjnl-2015-309595supp006.pdf [file gutjnl-2015-309595supp006.pdf]

**Supplementary Table 6: paired Wilcoxon test (genera) between cancer tissue and paired non-**

|                                    | <b>padjust</b> | <b>mean ON [%]</b> | <b>mean OFF [%]</b> |
|------------------------------------|----------------|--------------------|---------------------|
| Acetanaerobacterium                | 0.940136197    | 0.001556186        | 0.001874649         |
| Actinomyces                        | 1              | 0.000448116        | 0.000284811         |
| Akkermansia                        | 1              | 0.022768381        | 0.028719117         |
| Alistipes                          | 0.27128547     | 0.012783535        | 0.019605176         |
| Anaerorhabdus                      | 1              | 6.11068E-05        | 0.00018704          |
| Anaerostipes                       | 0.967006537    | 0.0066199          | 0.00695023          |
| Anaerotruncus                      | 0.940136197    | 0.000366641        | 0.000756661         |
| Bacteroides                        | 0.940136197    | 0.147919111        | 0.188438387         |
| Barnesiella                        | 1              | 0.006159562        | 0.007179779         |
| Bifidobacterium                    | 0.79121168     | 0.016751401        | 0.018491439         |
| Bilophila                          | 0.940136197    | 0.001250652        | 0.001526075         |
| Blautia                            | 0.27128547     | 0.048693945        | 0.067551138         |
| Butyricococcus                     | 1              | 0.00102252         | 0.001241264         |
| Butyricimonas                      | 0.940136197    | 0.001067332        | 0.001258268         |
| Campylobacter                      | 0.559987118    | 0.001454341        | 0.000131778         |
| Catenibacterium                    | 1              | 0.000545887        | 0.002282736         |
| Clostridium_IV                     | 1              | 0.00774019         | 0.007494346         |
| Clostridium_sensu_stricto          | 1              | 0.01141067         | 0.016939858         |
| Clostridium_XI                     | 0.27128547     | 0.007703526        | 0.014044992         |
| Clostridium_XIVa                   | 1              | 0.019615272        | 0.021050484         |
| Clostridium_XIVb                   | 1              | 0.00264796         | 0.00267807          |
| Clostridium_XVIII                  | 1              | 0.00195949         | 0.001241264         |
| Collinsella                        | 0.27128547     | 0.001262873        | 0.001942664         |
| Coprococcus                        | 1              | 0.01556593         | 0.01492918          |
| Desulfovibrio                      | 1              | 0.001759875        | 0.0039916           |
| Dialister                          | 0.940841784    | 0.004717442        | 0.004493207         |
| Dorea                              | 1              | 0.006554719        | 0.008174491         |
| Eggerthella                        | 1              | 0.000158878        | 0.000170036         |
| Erysipelotrichaceae_incertae_sedis | 0.967006537    | 0.001621366        | 0.001628097         |
| Escherichia_Shigella               | 0.967006537    | 0.052225916        | 0.032897757         |
| Eubacterium                        | 0.68067309     | 0.001385087        | 0.001011715         |
| Faecalibacterium                   | 1              | 0.063045887        | 0.069757358         |
| Flavonifractor                     | 0.68067309     | 0.003360872        | 0.004718505         |
| Fusobacterium                      | 0.967006537    | 0.031437394        | 0.003179677         |
| Gemella                            | 0.967006537    | 0.002924977        | 0.001122239         |
| Gemmiger                           | 1              | 0.018046865        | 0.018606213         |
| Granulicatella                     | 0.385916972    | 0.006159562        | 8.50181E-05         |
| Haemophilus                        | 1              | 0.012225427        | 0.012569927         |
| Halomonas                          | 0.453685614    | 0.026149622        | 0.012659196         |
| Holdemania                         | 1              | 0.000207763        | 0.000331571         |
| Howardella                         | 0.940136197    | 0.000562182        | 0.000480352         |
| Klebsiella                         | 1              | 0.005911061        | 0.009755828         |
| Lachnospiracea_incertae_sedis      | 0.940136197    | 0.052800319        | 0.057799561         |
| Lactobacillus                      | 1              | 0.002069482        | 0.00164085          |
| Mogibacterium                      | 1              | 0.000272944        | 0.000263556         |
| Odoribacter                        | 1              | 0.002969789        | 0.002372005         |
| Oscillibacter                      | 0.251122983    | 0.010583692        | 0.01469538          |
| Parabacteroides                    | 1              | 0.006440653        | 0.007876928         |

|                                 |             |             |             |
|---------------------------------|-------------|-------------|-------------|
| Paraprevotella                  | 1           | 0.001083627 | 0.001186003 |
| Parasutterella                  | 1           | 0.002334278 | 0.00253354  |
| Parvimonas                      | 0.940136197 | 0.006126972 | 0.001330533 |
| Peptococcus                     | 0.413830507 | 0.000293312 | 0.000425091 |
| Peptostreptococcus              | 0.940136197 | 0.005760331 | 0.001254017 |
| Phascolarctobacterium           | 1           | 0.004770402 | 0.005513424 |
| Porphyromonas                   | 0.940136197 | 0.010970701 | 0.005577188 |
| Prevotella                      | 1           | 0.070109829 | 0.076078455 |
| Pseudoflavonifractor            | 0.311383735 | 0.000325903 | 0.00056537  |
| Roseburia                       | 1           | 0.043055827 | 0.045641972 |
| Ruminococcus                    | 0.251122983 | 0.01291797  | 0.017590247 |
| Shewanella                      | 0.940136197 | 0.016107743 | 0.007634626 |
| Slackia                         | 1           | 5.7033E-05  | 9.35199E-05 |
| Sporobacter                     | 0.27128547  | 0.002020597 | 0.002962881 |
| Streptococcus                   | 0.79121168  | 0.042892876 | 0.016935607 |
| Sutterella                      | 1           | 0.010192609 | 0.011354168 |
| Turcibacter                     | 1           | 0.000700691 | 0.000871436 |
| unclassified.Bacteroidetes      | 1           | 0.001470636 | 0.002695074 |
| unclassified.Clostridiales      | 1           | 0.015268544 | 0.012569927 |
| unclassified.Coriobacteriaceae  | 1           | 0.000358493 | 0.000408087 |
| unclassified.Firmicutes         | 1           | 0.001780244 | 0.001857646 |
| unclassified.Lachnospiraceae    | 0.551218933 | 0.025966302 | 0.030691537 |
| unclassified.Porphyromonadaceae | 1           | 0.000700691 | 0.000726905 |
| unclassified.Rhodospirillaceae  | 1           | 0.00045219  | 0.001147744 |
| unclassified.Rhodospirillales   | 0.940136197 | 0.000924749 | 0.001215759 |
| unclassified.Ruminococcaceae    | 0.79121168  | 0.018963466 | 0.02164136  |
| Veillonella                     | 0.967006537 | 0.000965487 | 0.000382581 |
| Victivallis                     | 0.940136197 | 0.000199615 | 0.000357076 |

**·cancerous tissue**

**ratio**

0.830120937  
1.573383085  
0.792795293  
0.652049003  
0.326704545  
0.952471967  
0.484550562  
0.784973343  
0.857904085  
0.905900383  
0.81952182  
0.720845657  
0.823772831  
0.848254505  
11.03629032  
0.239137182  
1.032803933  
0.673598913  
0.548489205  
0.931820477  
0.988756614  
1.578624429  
0.650072939  
1.042651386  
0.440894569  
1.049905393  
0.801850407  
0.934375  
0.99586597  
1.587522074  
1.369047619  
0.90378834  
0.712274775  
9.886976381  
2.606376263  
0.969937552  
72.45  
0.972593281  
2.065662077  
0.626602564  
1.170353982  
0.605900508  
0.913507269  
1.261226252  
1.03561828  
1.252016129  
0.72020538  
0.81766055

0.913679809  
0.921350671  
4.604898829  
0.69  
4.593502825  
0.865233873  
1.967066819  
0.921546442  
0.576441103  
0.943338456  
0.734382552  
2.109827394  
0.609848485  
0.681970349  
2.532703732  
0.897697492  
0.804065041  
0.545675605  
1.21468831  
0.878472222  
0.958333333  
0.84604109  
0.963937622  
0.393981481  
0.760635198  
0.876260394  
2.523611111  
0.559027778
